# Supplementary material for: Time until treatment initiation is associated with catheter survival in peritoneal dialysis-related peritonitis
Source: PubMed Central journal article supplement (PMC7985378; doi:10.1038/s41598-021-86071-y), 2021-03-22

Supplementary figure

Fig. S1

(A)

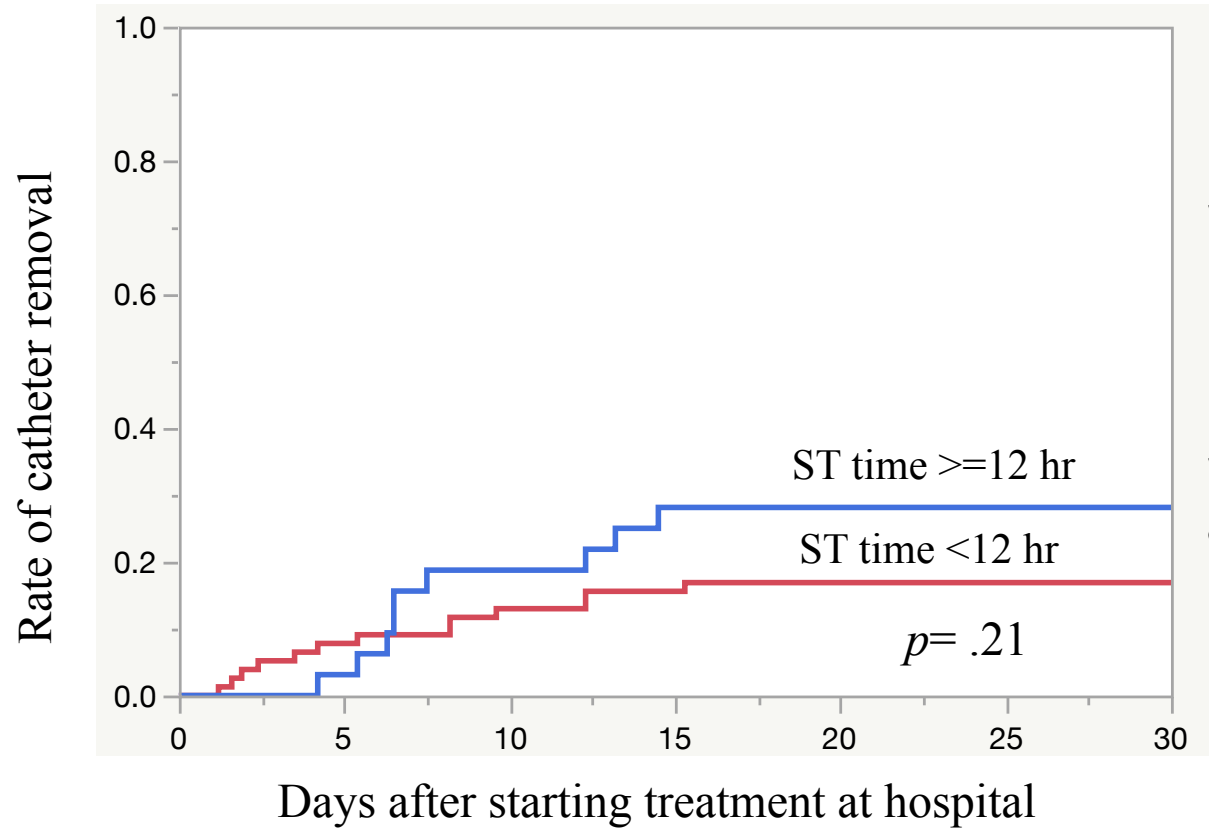

(B)

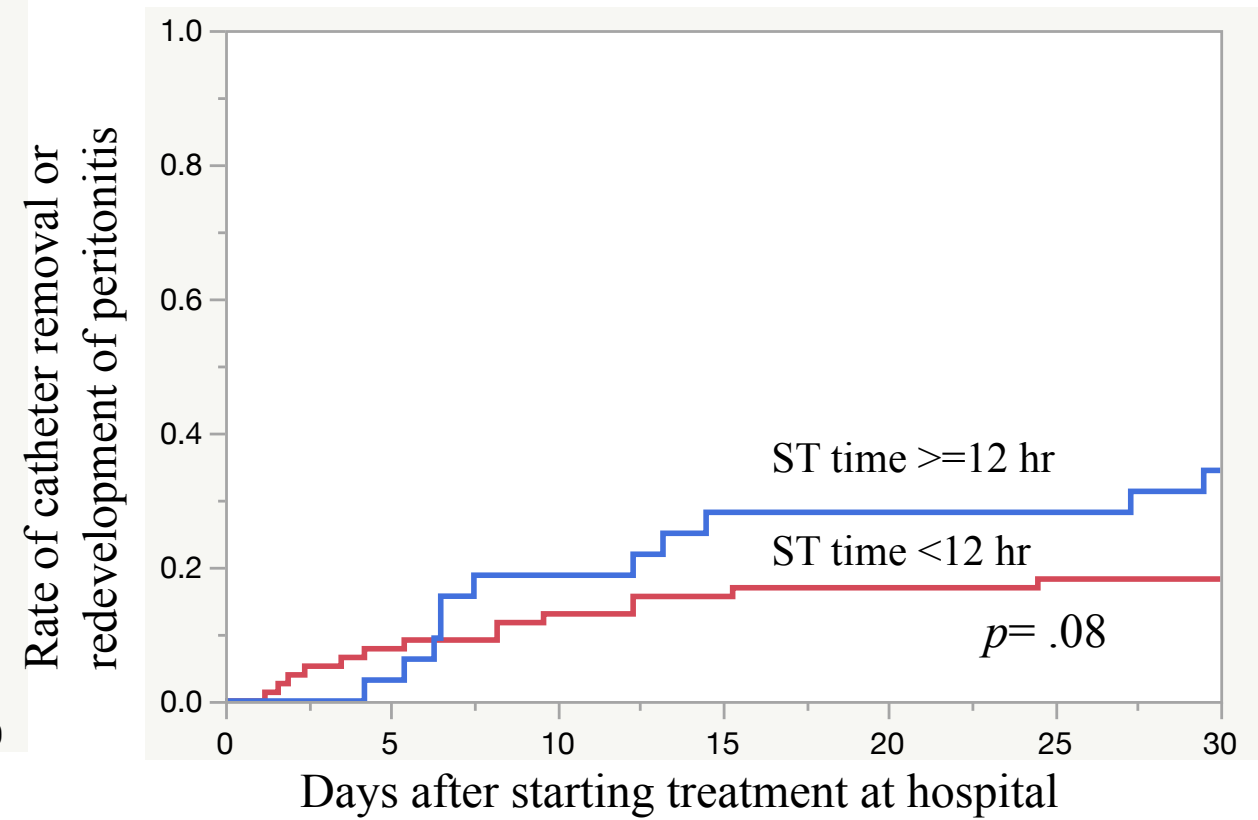

Fig. S2

(A)

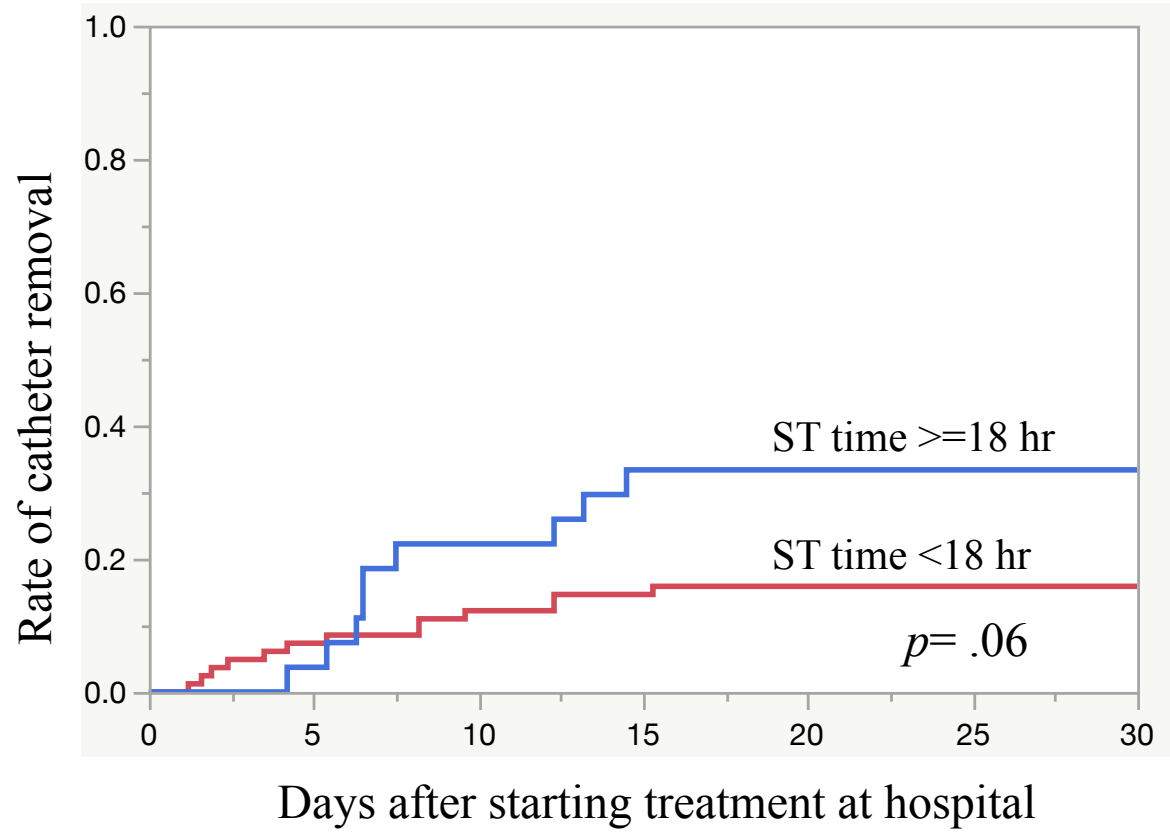

(B)

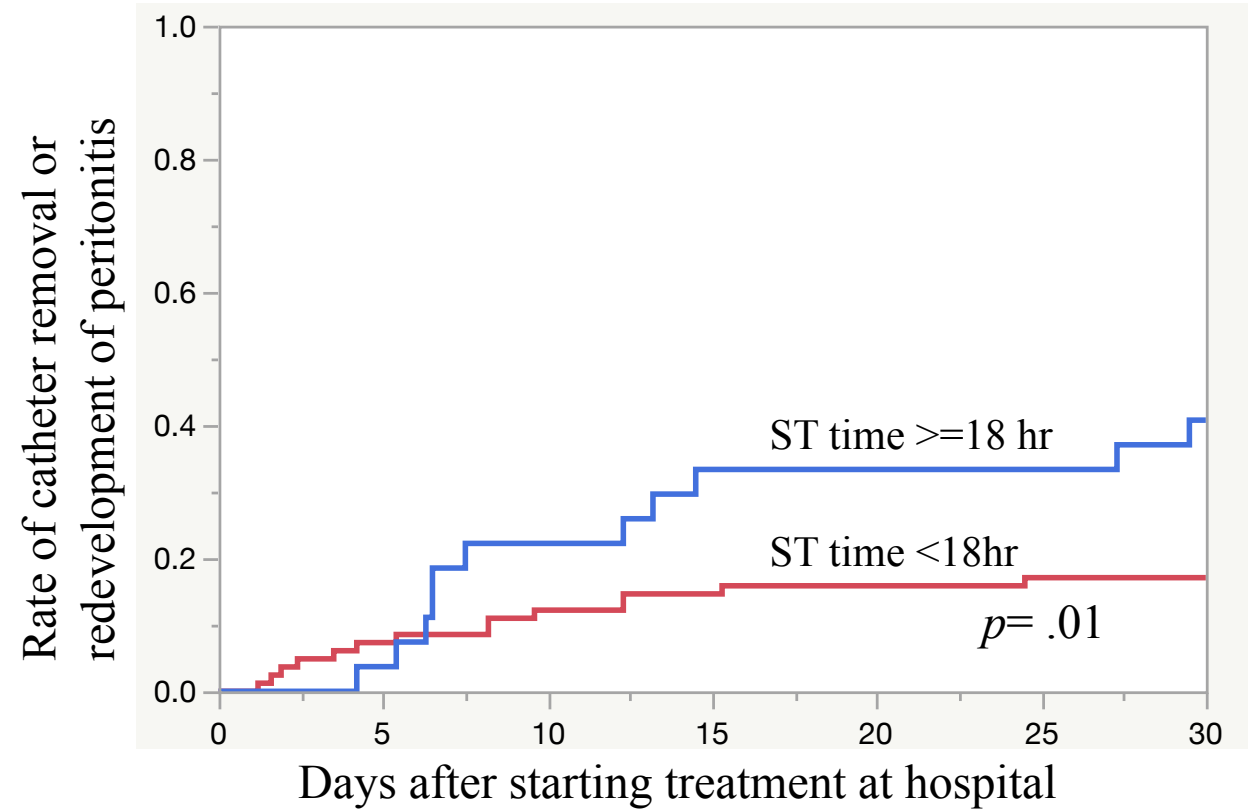

Supplement: 41598_2021_86071_MOESM2_ESM.pdf [file 41598_2021_86071_MOESM2_ESM.pdf]
