# Supplementary material for: Time until treatment initiation is associated with catheter survival in peritoneal dialysis-related peritonitis
Source: PubMed Central journal article supplement (PMC7985378; doi:10.1038/s41598-021-86071-y), 2021-03-22
Supplement: 41598_2021_86071_MOESM3_ESM.pdf [file 41598_2021_86071_MOESM3_ESM.pdf]

Time until treatment initiation is associated with catheter survival in peritoneal dialysis-related peritonitis

Rikako Oki<sup>1)</sup> †, Shiho Tsuji<sup>1)</sup> †, Yoshifumi Hamasaki<sup>1)</sup>\*, Yohei Komaru<sup>1)</sup>, Yoshihisa Miyamoto<sup>1)</sup>, Ryo Matsuura<sup>1)</sup>, Daisuke Yamada<sup>1)</sup>, Kent Doi<sup>2)</sup>, Haruki Kume<sup>3)</sup>, Masaomi Nangaku<sup>1)</sup>

1) Department of Hemodialysis and Apheresis, The University of Tokyo Hospital

2) Department of Acute Medicine, The University of Tokyo Hospital

3) Department of Urology, The University of Tokyo Hospital

†: Rikako Oki and Shiho Tsuji contributed equally to this work.

**\* Address correspondence:**

Yoshifumi Hamasaki, MD, PhD

Department of Hemodialysis and Apheresis, The University of Tokyo Hospital

Postal address: 7-3-1 Hongo, Bunkyo-ku, Tokyo 113-8655, Japan

E-mail address: [yhamasaki-tky@umin.ac.jp](mailto:yhamasaki-tky@umin.ac.jp)

Tel.: +81-3-3815-5411

FAX: +81-3-5800-8806

Supplementary Table 1. Comparison of causative microorganism between removal and non-removal groups

| microorganism<br>[n(%)]      | removal group<br>(N=22) | non-removal group<br>(N=87) | <i>p</i> |
|------------------------------|-------------------------|-----------------------------|----------|
| <i>CNS</i>                   | 2 (9%)                  | 14 (16%)                    | .41      |
| <i>Streptococcus spp.</i>    | 1 (5%)                  | 16 (18%)                    | .10      |
| <i>Staphylococcus aureus</i> | 4 (18%)                 | 6 (7%)                      | .10      |
| Other gram-positive cocci    | 3 (14%)                 | 4 (5%)                      | .12      |
| Gram-negative bacilli*       | 2 (9%)                  | 12 (14%)                    | .56      |
| Other bacteria**             | 0 (0%)                  | 3 (3%)                      | .38      |
| No growth                    | 10 (45%)                | 32 (37%)                    | .46      |

\*: except for *P. aeruginosa* and *Serratia spp.*

\*\*: *Corynebacterium*, Gram-positive bacilli

Supplementary Table 2. Comparison of causative microorganism between groups of ST time more or less than 24 hr

| microorganism [n(%)]         | ST time<24 hr<br>(N=88) | ST time>=24 hr<br>(N=21) | <i>p</i> |
|------------------------------|-------------------------|--------------------------|----------|
| <i>CNS</i>                   | 14 (16%)                | 2 (10%)                  | .46      |
| <i>Streptococcus spp.</i>    | 14 (16%)                | 3 (14%)                  | .85      |
| <i>Staphylococcus aureus</i> | 8 (9%)                  | 2 (10%)                  | .95      |
| Other gram-positive cocci    | 7 (8%)                  | 0 (0%)                   | .18      |
| Gram-negative bacilli*       | 10 (11%)                | 4 (19%)                  | .34      |
| Other bacteria**             | 2 (2%)                  | 1 (5%)                   | .53      |
| Culture negative peritonitis | 33 (38%)                | 9 (43%)                  | .65      |

\*: except for *P. aeruginosa* and *Serratia spp.*

\*\*: *Corynebacterium*, Gram-positive bacilli

Supplementary Table 3. Comparison between PD catheter removal and non-removal groups

| all<br>(N=109) | removal group<br>(N=22) | non-removal<br>group (N=87) | <i>p</i><br>(removal vs.<br>non-removal) |
|----------------|-------------------------|-----------------------------|------------------------------------------|
|----------------|-------------------------|-----------------------------|------------------------------------------|

|                                      |          |         |          |     |
|--------------------------------------|----------|---------|----------|-----|
| ST time $\geq$ 12 hr [ <i>n</i> (%)] | 32 (29%) | 9 (41%) | 23 (26%) | .18 |
| ST time $\geq$ 18 hr [ <i>n</i> (%)] | 27(25%)  | 9 (41%) | 18 (21%) | .05 |

Supplementary Table 4. Results of univariate logistic regression analysis for PD catheter removal

| Variables            | univariate       |          |
|----------------------|------------------|----------|
|                      | OR (95% CI)      | <i>p</i> |
| ST time $\geq$ 12 hr | 1.93 (0.73–5.10) | .19      |
| ST time $\geq$ 18 hr | 2.65 (0.98–7.18) | .06      |
